# Supplementary material
Source: PubMed Central journal article supplement (PMC5085925)
Supplement: NIHMS793086-supplement-01.pdf [file NIHMS793086-supplement-01.pdf]

31. Kociol RD, Horton JR, Fonarow GC, Reyes EM, Shaw LK, O'Connor CM, Felker GM, Hernandez AF. Admission, discharge, or change in B-type natriuretic peptide and long-term outcomes: data from Organized Program to Initiate Lifesaving Treatment in Hospitalized Patients with Heart Failure (OPTIMIZE-HF) linked to Medicare claims. *Circ Heart Fail* [Internet]. 2011 [cited 2015 Jan 5];4:628–36. Available from: <http://www.pubmedcentral.nih.gov/articlerender.fcgi?artid=3465672&tool=pmcentrez&rendertype=abstract>

**Supplemental Materials**

**Cardiovascular readmission/death at 60 days and serum potassium at baseline**

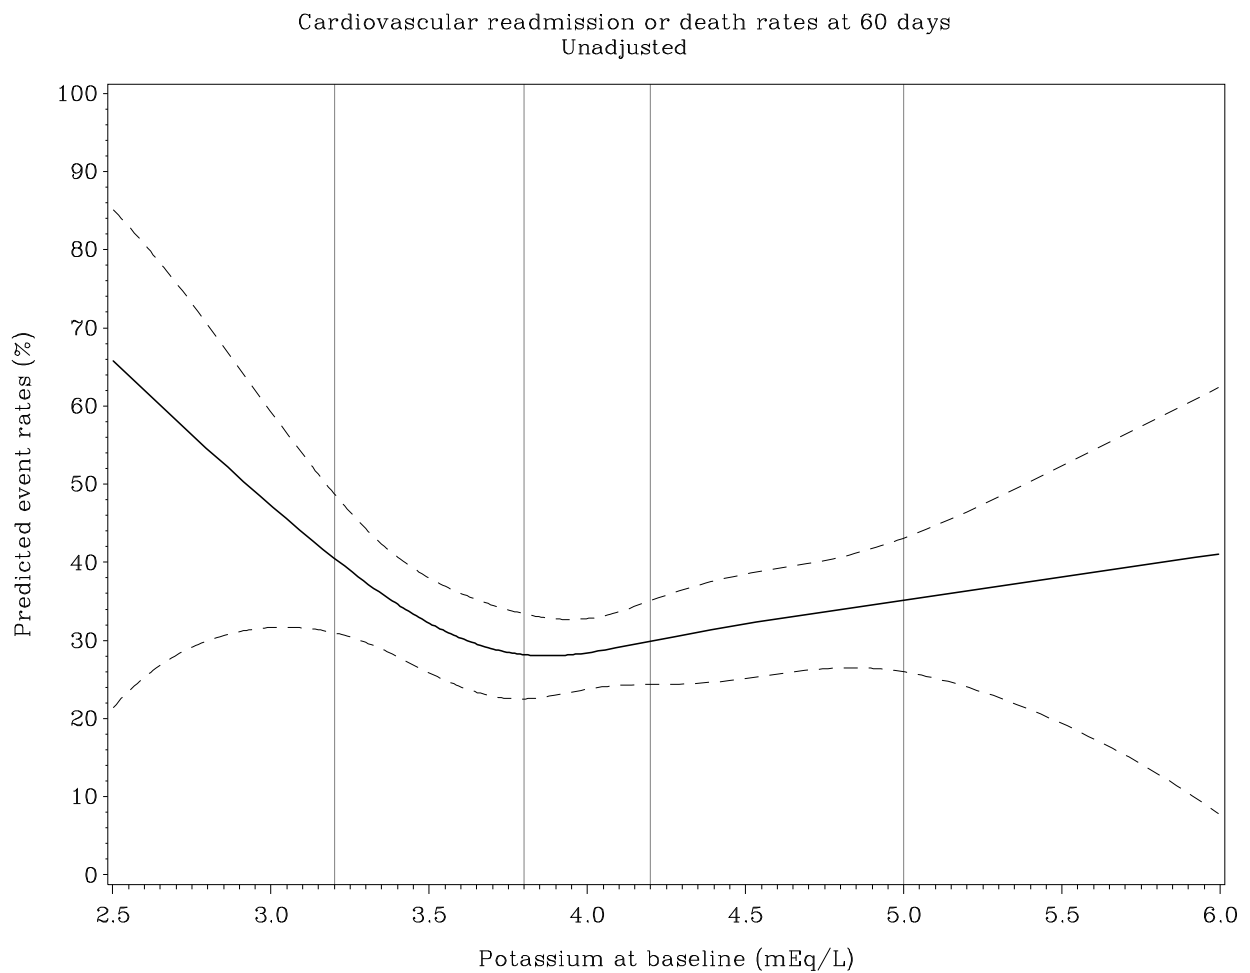

**Supplemental Table 1: Summary statistics by ACEI/ARB use**

|                                     | Never taking ACE/ARB (N=291) | Started ACE/ARB (N=51) | Stopped ACE/ARB (N=92) | Always taking ACE/ARB (N=313) | p-value |
|-------------------------------------|------------------------------|------------------------|------------------------|-------------------------------|---------|
| <b>Demographics</b>                 |                              |                        |                        |                               |         |
| Age, years                          | 69 (60, 78)                  | 71 (65, 79)            | 70 (62, 79)            | 67 (56, 77)                   | 0.0201  |
| Male sex                            | 215 (73.9)                   | 35 (68.6)              | 73 (79.3)              | 226 (72.2)                    | 0.4702  |
| White race                          | 232 (79.7)                   | 44 (86.3)              | 68 (73.9)              | 204 (65.2)                    | 0.0001  |
| <b>Clinical History</b>             |                              |                        |                        |                               |         |
| Ejection fraction, %                | 40 (22, 55)                  | 33 (22, 53)            | 33 (20, 55)            | 25 (20, 40)                   | <0.0001 |
| Ejection fraction <50%              | 176 (60.9)                   | 34 (68.0)              | 61 (67.0)              | 249 (80.6)                    | <0.0001 |
| Hospitalization for HF in last year | 216 (75.0)                   | 36 (72.0)              | 57 (62.6)              | 224 (72.5)                    | 0.1519  |
| Ischemia as cause of HF             | 187 (64.3)                   | 25 (49.0)              | 53 (57.6)              | 166 (53.0)                    | 0.0234  |
| Hypertension                        | 233 (80.1)                   | 37 (72.5)              | 74 (80.4)              | 267 (85.3)                    | 0.1018  |
| Atrial fibrillation / flutter       | 174 (59.8)                   | 30 (58.8)              | 47 (51.1)              | 160 (51.1)                    | 0.1399  |
| Diabetes                            | 169 (58.1)                   | 28 (54.9)              | 60 (65.2)              | 166 (53.0)                    | 0.1936  |
| ICD                                 | 100 (34.4)                   | 20 (39.2)              | 42 (45.7)              | 124 (39.6)                    | 0.2347  |
| TIA                                 | 19 (6.5)                     | 5 (9.8)                | 4 (4.3)                | 29 (9.3)                      | 0.3292  |
| Stroke                              | 38 (13.1)                    | 6 (11.8)               | 6 (6.5)                | 34 (10.9)                     | 0.3802  |
| Hyperlipidemia                      | 212 (72.9)                   | 36 (70.6)              | 75 (81.5)              | 222 (70.9)                    | 0.2385  |
| Peripheral vascular disease         | 52 (17.9)                    | 11 (21.6)              | 16 (17.4)              | 40 (12.8)                     | 0.2128  |
| COPD                                | 83 (28.5)                    | 13 (25.5)              | 20 (21.7)              | 81 (25.9)                     | 0.6216  |
| Arrhythmia                          | 190 (65.3)                   | 31 (60.8)              | 58 (63.0)              | 169 (54.0)                    | 0.0373  |
| Current smoking or quit <6m ago     | 39 (13.4)                    | 2 (3.9)                | 10 (10.9)              | 65 (20.8)                     | 0.0025  |
| Chronic alcohol use                 | 22 (7.6)                     | 2 (3.9)                | 7 (7.6)                | 29 (9.3)                      | 0.5890  |
| Gout                                | 93 (32.0)                    | 18 (35.3)              | 20 (21.7)              | 64 (20.4)                     | 0.0037  |
| Hepatic disease                     | 16 (5.5)                     | 1 (2.0)                | 2 (2.2)                | 13 (4.2)                      | 0.5445  |
| Malignancy                          | 21 (7.2)                     | 4 (7.8)                | 9 (9.8)                | 18 (5.8)                      | 0.5872  |
| Depression                          | 67 (23.0)                    | 10 (19.6)              | 10 (10.9)              | 73 (23.3)                     | 0.0629  |
| <b>Trial</b>                        |                              |                        |                        |                               | <0.0001 |
| CARRESS                             | 82 (28.2)                    | 13 (25.5)              | 21 (22.8)              | 51 (16.3)                     |         |
| DOSE                                | 84 (28.9)                    | 23 (45.1)              | 29 (31.5)              | 160 (51.1)                    |         |
| ROSE                                | 125 (43.0)                   | 15 (29.4)              | 42 (45.7)              | 102 (32.6)                    |         |
| <b>NYHA classification</b>          |                              |                        |                        |                               | 0.8316  |
| I-II                                | 9 (3.4)                      | 0 (0)                  | 5 (5.7)                | 10 (3.3)                      |         |
| III                                 | 169 (63.1)                   | 31 (70.5)              | 56 (63.6)              | 184 (62.0)                    |         |
| IV                                  | 90 (33.6)                    | 13 (29.5)              | 27 (30.7)              | 103 (34.7)                    |         |
| <b>Medications (Baseline)</b>       |                              |                        |                        |                               |         |
| Hydralazine                         | 73 (25.1)                    | 8 (15.7)               | 8 (8.7)                | 48 (15.3)                     | 0.0008  |

|                                             | Never taking ACE/ARB (N=291) | Started ACE/ARB (N=51) | Stopped ACE/ARB (N=92) | Always taking ACE/ARB (N=313) | p-value |
|---------------------------------------------|------------------------------|------------------------|------------------------|-------------------------------|---------|
| Nitrates                                    | 93 (32.0)                    | 11 (21.6)              | 19 (20.7)              | 89 (28.4)                     | 0.1271  |
| Beta-blocker                                | 220 (75.6)                   | 40 (78.4)              | 78 (84.8)              | 274 (87.5)                    | 0.0015  |
| Aldosterone antagonist                      | 72 (24.7)                    | 8 (15.7)               | 32 (34.8)              | 91 (29.1)                     | 0.0567  |
| Digoxin                                     | 62 (21.3)                    | 12 (23.5)              | 24 (26.1)              | 91 (29.1)                     | 0.1771  |
| Aspirin                                     | 195 (67.0)                   | 39 (76.5)              | 60 (65.2)              | 216 (69.0)                    | 0.5180  |
| Warfarin                                    | 111 (38.1)                   | 28 (54.9)              | 42 (45.7)              | 133 (42.5)                    | 0.1221  |
| <b>Clinical Assessment (Baseline)</b>       |                              |                        |                        |                               |         |
| Body mass index, kg/m <sup>2</sup>          | 30.7 (26.8, 36.5)            | 32.0 (27.5, 40.7)      | 31.7 (27.8, 38.4)      | 32.5 (26.5, 38.9)             | 0.3604  |
| Weight, kg                                  | 90 (78, 110)                 | 96 (77, 124)           | 94 (85, 116)           | 95 (79, 116)                  | 0.2261  |
| Systolic blood pressure, mmHg               | 114 (102, 124)               | 115 (108, 126)         | 110 (100, 125)         | 117 (105, 132)                | 0.0045  |
| Diastolic blood pressure, mmHg              | 64 (58, 72)                  | 67 (59, 73)            | 61 (56, 72)            | 68 (60, 79)                   | 0.0030  |
| Heart rate, beats/min                       | 75 (68, 85)                  | 73 (68, 82)            | 76 (65, 87)            | 75 (67, 85)                   | 0.9634  |
| Edema ≥ 2+                                  | 239 (82.4)                   | 42 (82.4)              | 69 (75.0)              | 233 (74.7)                    | 0.0950  |
| JVP ≥ 8 cm water                            | 257 (93.5)                   | 46 (97.9)              | 86 (97.7)              | 282 (94.0)                    | 0.3874  |
| Orthopnea                                   | 253 (90.7)                   | 45 (95.7)              | 79 (90.8)              | 275 (91.4)                    | 0.7211  |
| Rales                                       | 171 (59.4)                   | 29 (58.0)              | 49 (54.4)              | 169 (54.0)                    | 0.5795  |
| S3 auscultation                             | 71 (25.1)                    | 11 (21.6)              | 19 (20.9)              | 62 (20.3)                     | 0.5467  |
| SpO <sub>2</sub>                            | 96 (94, 98)                  | 96 (95, 98)            | 97 (95, 98)            | 97 (95, 98)                   | 0.2440  |
| <b>Self-assessment (Baseline)</b>           |                              |                        |                        |                               |         |
| Global VAS                                  | 50 (32, 67)                  | 42 (16, 60)            | 47 (27, 60)            | 50 (30, 67)                   | 0.0846  |
| Dyspnea VAS                                 | 56 (33, 80)                  | 50 (25, 70)            | 49 (30, 72)            | 51 (33, 74)                   | 0.1502  |
| <b>Laboratories (Baseline)</b>              |                              |                        |                        |                               |         |
| Sodium, mg/L                                | 138 (135, 140)               | 139 (136, 141)         | 138 (136, 141)         | 138 (136, 141)                | 0.3631  |
| Potassium, mEq/L                            | 4.0 (3.6, 4.3)               | 4.05 (3.7, 4.3)        | 4.1 (3.8, 4.5)         | 4.0 (3.7, 4.3)                | 0.2422  |
| Bicarbonate, mEq/L                          | 28 (25, 31)                  | 29 (26, 31)            | 28 (25, 30)            | 28 (25, 30)                   | 0.2175  |
| Hemoglobin, g/dL                            | 11.0 (9.8, 11.9)             | 10.6 (9.7, 12.2)       | 11.8 (10.2, 12.8)      | 11.8 (10.5, 13.2)             | <0.0001 |
| Blood urea nitrogen, mg/dl                  | 45 (30, 64)                  | 38 (28, 50)            | 48 (31, 61)            | 31 (21, 46)                   | <0.0001 |
| GFR, mL/min/1.73m <sup>2</sup>              | 36.7 (27.2, 48.7)            | 38.0 (31.1, 55.5)      | 37.2 (29.4, 47.6)      | 50.7 (37.3, 62.5)             | <0.0001 |
| Serum creatinine, mg/dl                     | 1.90 (1.50, 2.40)            | 1.80 (1.30, 2.10)      | 1.93 (1.50, 2.35)      | 1.50 (1.20, 1.88)             | <0.0001 |
| NT-proBNP, pg/ml                            | 6379 (2483, 12724)           | 4627 (2161, 11331)     | 4339 (1715, 9005)      | 4141 (2239, 9177)             | 0.0051  |
| Serum aldosterone, pg/ml                    | 290 (152, 514)               | 220 (149, 401)         | 179 (93, 309)          | 162 (94, 278)                 | <0.0001 |
| Cystatin C, mg/L                            | 1.95 (1.58, 2.40)            | 1.62 (1.37, 2.22)      | 1.87 (1.49, 2.31)      | 1.48 (1.18, 1.93)             | <0.0001 |
| Uric acid, mg/dL                            | 10.5 (8.5, 12.0)             | 9.5 (8.3, 11.3)        | 10.7 (8.6, 13.1)       | 9.7 (8.1, 11.3)               | 0.0211  |
| Plasma renin activity, ng/mL/hr             | 5.6 (1.6, 14.5)              | 3.19 (0.95, 8.69)      | 5.9 (1.0, 16.6)        | 3.9 (0.5, 18.6)               | 0.4515  |
| <b>Days from randomization to discharge</b> | 7 (5, 12)                    | 6 (4, 10)              | 7 (5, 14)              | 5 (4, 7)                      | <0.0001 |

|                                              | Never taking ACE/ARB (N=291) | Started ACE/ARB (N=51) | Stopped ACE/ARB (N=92) | Always taking ACE/ARB (N=313) | p-value |
|----------------------------------------------|------------------------------|------------------------|------------------------|-------------------------------|---------|
| <b>Clinical Assessment (Discharge/Day 7)</b> |                              |                        |                        |                               |         |
| Edema ≥2                                     | 75 (26.8)                    | 16 (32.0)              | 30 (34.5)              | 61 (20.7)                     | 0.0344  |
| JVP ≥ 8 cm water                             | 157 (60.6)                   | 25 (61.0)              | 54 (68.4)              | 107 (42.1)                    | <0.0001 |
| Heart rate                                   | 73 (66, 84)                  | 72 (65, 84)            | 74 (64, 86)            | 72 (65, 82)                   | 0.8385  |
| Systolic blood pressure, mmHg                | 109 (98, 123)                | 112 (102, 134)         | 108 (99, 125)          | 112 (100, 128)                | 0.1630  |
| Diastolic blood pressure, mmHg               | 60 (54, 68)                  | 62 (55, 70)            | 60 (55, 69)            | 62 (56, 72)                   | 0.0334  |
| Weight, kg                                   | 83 (72, 103)                 | 90 (73, 120)           | 87 (77, 110)           | 89 (75, 111)                  | 0.0775  |
| BMI, kg/m <sup>2</sup>                       | 28.5 (24.4, 34.1)            | 30.9 (25.6, 39.7)      | 30.5 (25.1, 36.3)      | 30.2 (24.8, 36.9)             | 0.2242  |
| Orthopnea                                    | 169 (66.5)                   | 28 (68.3)              | 52 (69.3)              | 177 (68.9)                    | 0.9399  |
| Orthoedema score                             |                              |                        |                        |                               | 0.0487  |
| 0                                            | 145 (51.8)                   | 27 (54.0)              | 37 (42.5)              | 178 (59.7)                    |         |
| 1                                            | 25 (8.9)                     | 7 (14.0)               | 15 (17.2)              | 28 (9.4)                      |         |
| 2                                            | 63 (22.5)                    | 7 (14.0)               | 22 (25.3)              | 62 (20.8)                     |         |
| 3                                            | 34 (12.1)                    | 6 (12.0)               | 7 (8.0)                | 25 (8.4)                      |         |
| 4                                            | 13 (4.6)                     | 3 (6.0)                | 6 (6.9)                | 5 (1.7)                       |         |
| SpO <sub>2</sub>                             | 96 (95, 98)                  | 97 (96, 98)            | 96 (95, 98)            | 97 (95, 98)                   | 0.5260  |
| <b>Medications (Discharge/Day 7)</b>         |                              |                        |                        |                               |         |
| Hydralazine                                  | 88 (30.2)                    | 7 (13.7)               | 19 (20.7)              | 47 (15.0)                     | <0.0001 |
| Nitrates                                     | 97 (33.3)                    | 12 (23.5)              | 28 (30.4)              | 94 (30.0)                     | 0.5274  |
| Beta-blocker                                 | 210 (72.2)                   | 41 (80.4)              | 73 (79.3)              | 273 (87.2)                    | 0.0001  |
| Aldosterone antagonist                       | 77 (26.5)                    | 13 (25.5)              | 27 (29.3)              | 111 (35.5)                    | 0.0882  |
| Digoxin                                      | 65 (22.3)                    | 15 (29.4)              | 26 (28.3)              | 102 (32.6)                    | 0.0467  |
| Aspirin                                      | 213 (73.2)                   | 39 (76.5)              | 59 (64.1)              | 225 (71.9)                    | 0.3209  |
| Warfarin                                     | 124 (42.6)                   | 27 (52.9)              | 36 (39.1)              | 138 (44.1)                    | 0.4399  |
| <b>Laboratories (Discharge/Day7)</b>         |                              |                        |                        |                               |         |
| Sodium, mg/L                                 | 137 (134, 139)               | 138 (136, 141)         | 137 (134, 140)         | 137 (135, 140)                | 0.0208  |
| Potassium, mEq/L                             | 4.0 (3.7, 4.3)               | 4.0 (3.8, 4.3)         | 4.1 (3.7, 4.4)         | 4.1 (3.8, 4.4)                | 0.0139  |
| BUN, mg/dL                                   | 51 (34, 72)                  | 44 (32, 65)            | 57 (36, 72)            | 36 (26, 53)                   | <0.0001 |
| Bicarbonate, mEq/L                           | 29 (27, 32)                  | 29 (27, 32)            | 29 (27, 32)            | 29 (27, 32)                   | 0.9722  |
| Creatinine, mg/dL                            | 1.90 (1.49, 2.50)            | 1.70 (1.40, 2.10)      | 1.93 (1.60, 2.40)      | 1.54 (1.20, 1.91)             | <0.0001 |
| GFR                                          | 35.5 (25.7, 48.7)            | 37.7 (30.6, 49.3)      | 35.7 (27.6, 44.9)      | 46.8 (35.4, 65.5)             | <0.0001 |

**Supplemental Table 2: Baseline Characteristics – Overall and by timing of readmission/death**

|                                       | <b>Overall</b> | <b>Readmission / death ≤ 30d of discharge (N=195)</b> | <b>Readmission / death 31-60d of discharge (N=89)</b> | <b>No readmission / death (N=460)</b> |
|---------------------------------------|----------------|-------------------------------------------------------|-------------------------------------------------------|---------------------------------------|
| <b>Demographics</b>                   |                |                                                       |                                                       |                                       |
| Age, years                            | 69 (60, 78)    | 68 (58, 77)                                           | 71 (63, 79)                                           | 69 (60, 79)                           |
| Sex, Male                             | 559 (75.1)     | 140 (71.8)                                            | 65 (73.0)                                             | 354 (77.0)                            |
| White race                            | 554 (74.5)     | 144 (73.8)                                            | 61 (68.5)                                             | 349 (75.9)                            |
| <b>Clinical History</b>               |                |                                                       |                                                       |                                       |
| Ejection fraction, %                  | 30 (20, 53)    | 28.5 (20.0, 51.0)                                     | 32.5 (23.0, 50.0)                                     | 32 (20, 55)                           |
| Ejection fraction <50%                | 516 (70.0)     | 136 (70.8)                                            | 65 (73.9)                                             | 315 (68.9)                            |
| Hospitalization for HF in last year,  | 524 (71.2)     | 150 (77.7)                                            | 71 (81.6)                                             | 303 (66.4)                            |
| Ischemia as cause of HF,              | 438 (58.9)     | 122 (62.6)                                            | 48 (53.9)                                             | 268 (58.3)                            |
| Hypertension                          | 611 (82.1)     | 154 (79.0)                                            | 73 (82.0)                                             | 384 (83.5)                            |
| Atrial fibrillation / flutter         | 412 (55.4)     | 107 (54.9)                                            | 47 (52.8)                                             | 258 (56.1)                            |
| Diabetes                              | 419 (56.3)     | 113 (57.9)                                            | 58 (65.2)                                             | 248 (53.9)                            |
| ICD                                   | 294 (39.5)     | 76 (39.0)                                             | 42 (47.2)                                             | 176 (38.3)                            |
| TIA                                   | 57 (7.7)       | 13 (6.7)                                              | 7 (7.9)                                               | 37 (8.0)                              |
| Stroke                                | 80 (10.8)      | 14 (7.2)                                              | 13 (14.6)                                             | 53 (11.5)                             |
| Hyperlipidemia                        | 556 (74.7)     | 149 (76.4)                                            | 69 (77.5)                                             | 338 (73.5)                            |
| Peripheral vascular disease           | 114 (15.3)     | 34 (17.4)                                             | 12 (13.5)                                             | 68 (14.8)                             |
| Chronic obstructive pulmonary disease | 201 (27.0)     | 61 (31.3)                                             | 24 (27.0)                                             | 116 (25.2)                            |
| Arrhythmia                            | 451 (60.6)     | 121 (62.1)                                            | 52 (58.4)                                             | 278 (60.4)                            |
| Current smoking or quit <6m ago       | 117 (15.7)     | 30 (15.4)                                             | 16 (18.0)                                             | 71 (15.4)                             |
| Chronic alcohol use                   | 58 (7.8)       | 11 (5.6)                                              | 7 (7.9)                                               | 40 (8.7)                              |
| Gout                                  | 206 (27.7)     | 53 (27.2)                                             | 33 (37.1)                                             | 120 (26.1)                            |
| Hepatic disease                       | 33 (4.4)       | 7 (3.6)                                               | 7 (7.9)                                               | 19 (4.1)                              |
| Malignancy                            | 50 (6.7)       | 12 (6.2)                                              | 2 (2.2)                                               | 36 (7.8)                              |
| Depression                            | 163 (21.9)     | 51 (26.2)                                             | 22 (24.7)                                             | 90 (19.6)                             |
| <b>NYHA classification</b>            |                |                                                       |                                                       |                                       |
| I - II                                | 28 (4.0)       | 5 (2.8)                                               | 1 (1.2)                                               | 22 (5.1)                              |
| III                                   | 442 (63.6)     | 111 (61.7)                                            | 51 (60.7)                                             | 280 (65.0)                            |
| IV                                    | 225 (32.4)     | 64 (35.6)                                             | 32 (38.1)                                             | 129 (29.9)                            |
| <b>Medications</b>                    |                |                                                       |                                                       |                                       |
| ACE inhibitor or ARB                  | 400 (53.8)     | 79 (40.5)                                             | 43 (48.3)                                             | 278 (60.4)                            |
| Hydralazine                           | 136 (18.3)     | 32 (16.4)                                             | 18 (20.2)                                             | 86 (18.7)                             |
| Nitrates                              | 208 (28.0)     | 50 (25.6)                                             | 33 (37.1)                                             | 125 (27.2)                            |
| Beta-blocker                          | 617 (82.9)     | 148 (75.9)                                            | 79 (88.8)                                             | 390 (84.8)                            |
| Aldosterone antagonist                | 208 (28.0)     | 54 (27.7)                                             | 33 (37.1)                                             | 121 (26.3)                            |
| Digoxin                               | 187 (25.1)     | 56 (28.7)                                             | 25 (28.1)                                             | 106 (23.0)                            |
| Aspirin                               | 497 (66.8)     | 129 (66.2)                                            | 58 (65.2)                                             | 310 (67.4)                            |
| Warfarin                              | 320 (43.0)     | 78 (40.0)                                             | 42 (47.2)                                             | 200 (43.5)                            |

| <b>Clinical Assessment</b>         |                    |                    |                    |                   |
|------------------------------------|--------------------|--------------------|--------------------|-------------------|
| Body mass index, kg/m <sup>2</sup> | 31.3 (26.8, 37.7)  | 30.6 (26.2, 36.6)  | 30.5 (25.9, 37.3)  | 31.7 (27.2, 38.0) |
| Weight, kg                         | 92 (79, 114)       | 91 (78, 113)       | 91 (77, 112)       | 93 (79, 114)      |
| Systolic blood pressure, mmHg      | 114 (104, 127)     | 113 (102, 124)     | 112 (100, 128)     | 116 (106, 130)    |
| Diastolic blood pressure, mmHg     | 66 (59, 74)        | 63 (58, 72)        | 65 (58, 71)        | 67 (59, 76)       |
| Heart rate, beats/min              | 75 (66, 84)        | 77 (69, 88)        | 74 (63, 79)        | 74 (65, 84)       |
| Edema ≥ 2+                         | 572 (77.1)         | 156 (80.0)         | 76 (85.4)          | 340 (74.2)        |
| JVP ≥ 8 cm water                   | 668 (94.2)         | 177 (95.2)         | 79 (92.9)          | 412 (94.1)        |
| Orthopnea                          | 645 (90.6)         | 175 (92.6)         | 74 (90.2)          | 396 (89.8)        |
| Rales                              | 408 (55.1)         | 104 (53.3)         | 45 (51.1)          | 259 (56.7)        |
| S3 auscultation                    | 160 (21.9)         | 41 (21.2)          | 22 (25.0)          | 97 (21.6)         |
| SpO <sub>2</sub>                   | 96 (94, 98)        | 97 (94, 98)        | 97 (94, 98)        | 96 (94, 98)       |
| <b>Self-assessment</b>             |                    |                    |                    |                   |
| Global VAS                         | 50 (30, 67)        | 50 (30, 65)        | 52 (40, 63)        | 50 (30, 69)       |
| Dyspnea VAS                        | 54 (33, 77)        | 53 (32, 75)        | 50 (38, 71)        | 55 (34, 78)       |
| <b>Laboratories</b>                |                    |                    |                    |                   |
| Sodium, mg/L                       | 138 (136, 141)     | 137 (135, 140)     | 139 (136, 140)     | 139 (136, 141)    |
| Potassium, mEq/L                   | 4 (3.7, 4.3)       | 4.0 (3.6, 4.4)     | 4.0 (3.6, 4.3)     | 4.0 (3.7, 4.3)    |
| Bicarbonate, mEq/L                 | 28 (25, 30)        | 28 (25, 31)        | 27 (24, 30)        | 28 (25, 30)       |
| Hemoglobin, g/dL                   | 11.3 (10.2, 12.7)  | 11.1 (10.0, 12.4)  | 10.9 (10.0, 12.4)  | 11.6 (10.3, 12.9) |
| Blood urea nitrogen, mg/dl         | 38 (26, 53)        | 45 (29, 56)        | 42 (30, 55)        | 34 (25, 48)       |
| GFR, mL/min/1.73m <sup>2</sup>     | 41.3 (31.1, 55.2)  | 38.4 (29.9, 52.5)  | 40.7 (29.4, 54.5)  | 43.7 (32.7, 57.2) |
| Serum creatinine, mg/dl            | 1.7 (1.36, 2.15)   | 1.81 (1.43, 2.25)  | 1.76 (1.47, 2.15)  | 1.65 (1.31, 2.09) |
| NT-proBNP, pg/ml                   | 4503 (2315, 10150) | 5073 (2587, 11397) | 5773 (2331, 10120) | 4209 (2069, 9750) |
| Serum aldosterone, pg/ml           | 200 (108, 356)     | 253 (117, 401)     | 200 (117, 309)     | 169 (102, 325)    |
| Cystatin C, mg/L                   | 1.7 (1.36, 2.18)   | 1.86 (1.41, 2.30)  | 1.80 (1.43, 2.26)  | 1.63 (1.33, 2.11) |
| Uric acid, mg/dL                   | 9.9 (8.1, 11.8)    | 10.1 (8.6, 11.8)   | 10.4 (8.7, 12.0)   | 9.7 (8.0, 11.5)   |
| Plasma renin activity              | 4.9 (0.9, 15.9)    | 9.6 (1.5, 26.0)    | 3.47 (0.78, 9.18)  | 3.4 (0.9, 13.1)   |

Values are presented as median (25<sup>th</sup> percentile, 75<sup>th</sup> percentile) for continuous variables and number (%) for frequencies.

**Supplemental Table 3: Discharge / Day 7 Characteristics – Overall and by timing of readmission/death**

|                                                | <b>Overall</b>    | <b>Readmission / death ≤ 30d of discharge (N=195)</b> | <b>Readmission / death 31-60d of discharge (N=89)</b> | <b>No readmission / death (N=460)</b> |
|------------------------------------------------|-------------------|-------------------------------------------------------|-------------------------------------------------------|---------------------------------------|
| <b>Days from Randomization to Discharge</b>    | 6 (4,9)           | 7 (4, 11)                                             | 6 (4, 9)                                              | 6 (4, 8)                              |
| <b>Clinical Assessment (Discharge / Day 7)</b> |                   |                                                       |                                                       |                                       |
| Edema ≥2                                       | 168 (23.7)        | 48 (25.9)                                             | 21 (24.4)                                             | 99 (22.6)                             |
| JVP ≥ 8 cm water                               | 330 (51.9)        | 90 (52.9)                                             | 46 (60.5)                                             | 194 (49.7)                            |
| Heart rate                                     | 72.5 (65, 83)     | 75.0 (65.5, 87.0)                                     | 72 (66, 80)                                           | 72 (65, 82)                           |
| SBP (mmHg)                                     | 110 (100, 125)    | 108 (98, 123)                                         | 109 (98, 123)                                         | 112 (100, 128)                        |
| DBP (mmHg)                                     | 61 (56, 70)       | 60.0 (56.0, 68.5)                                     | 60 (54, 69)                                           | 62 (56, 70)                           |
| Weight (kg)                                    | 86 (74, 109)      | 85 (73, 105)                                          | 86 (72, 106)                                          | 87 (74, 109)                          |
| BMI (kg/m <sup>2</sup> )                       | 29.5 (24.8, 36.1) | 28.9 (25.1, 34.2)                                     | 29.0 (24.0, 35.6)                                     | 29.8 (24.9, 36.5)                     |
| Orthopnea                                      | 417 (66.1)        | 113 (66.5)                                            | 48 (60.8)                                             | 256 (67.0)                            |
| <b>Orthoedema score</b>                        |                   |                                                       |                                                       |                                       |
| 0                                              | 405 (56.8)        | 102 (54.5)                                            | 48 (55.8)                                             | 255 (58.0)                            |
| 1                                              | 70 (9.8)          | 18 (9.6)                                              | 7 (8.1)                                               | 45 (10.2)                             |
| 2                                              | 148 (20.8)        | 39 (20.9)                                             | 17 (19.8)                                             | 92 (20.9)                             |
| 3                                              | 63 (8.8)          | 19 (10.2)                                             | 9 (10.5)                                              | 35 (8.0)                              |
| 4                                              | 27 (3.8)          | 9 (4.8)                                               | 5 (5.8)                                               | 13 (3.0)                              |
| SpO <sub>2</sub> , %                           | 96 (95, 98)       | 96 (95, 98)                                           | 97 (95, 99)                                           | 96 (95, 98)                           |
| <b>Medications (Discharge)</b>                 |                   |                                                       |                                                       |                                       |
| ACE inhibitor or ARB                           | 334 (49.0)        | 67 (37.6)                                             | 34 (41.0)                                             | 233 (55.3)                            |
| Hydralazine                                    | 146 (21.4)        | 37 (20.8)                                             | 23 (27.7)                                             | 86 (20.4)                             |
| Nitrates                                       | 215 (31.5)        | 46 (25.8)                                             | 34 (41.0)                                             | 135 (32.1)                            |
| Beta-blocker                                   | 549 (80.5)        | 135 (75.8)                                            | 67 (80.7)                                             | 347 (82.4)                            |
| Aldosterone antagonist                         | 218 (32.0)        | 50 (28.1)                                             | 31 (37.3)                                             | 137 (32.5)                            |
| Digoxin                                        | 189 (27.7)        | 49 (27.5)                                             | 24 (28.9)                                             | 116 (27.6)                            |
| Aspirin                                        | 491 (72.0)        | 125 (70.2)                                            | 59 (71.1)                                             | 307 (72.9)                            |
| Warfarin                                       | 302 (44.3)        | 77 (43.3)                                             | 34 (41.0)                                             | 191 (45.4)                            |
| <b>Laboraties (Discharge / Day 7)</b>          |                   |                                                       |                                                       |                                       |
| Sodium, mg/L                                   | 137 (135, 140)    | 137 (134, 139)                                        | 137 (135, 140)                                        | 137 (135, 140)                        |
| Potassium mEq/L                                | 4 (3.8, 4.4)      | 4.1 (3.7, 4.4)                                        | 4.1 (3.8, 4.3)                                        | 4.0 (3.8, 4.4)                        |
| Blood urea nitrogen, mg/dl                     | 44 (30, 63)       | 47.5 (31.0, 64.5)                                     | 51 (34, 68)                                           | 41 (29, 59)                           |
| Bicarbonate, mEq/L                             | 29 (27, 32)       | 30 (27, 32)                                           | 29.0 (26.5, 32.0)                                     | 29 (27, 32)                           |
| Serum creatinine, mg/dl                        | 1.72 (1.38, 2.17) | 1.70 (1.40, 2.30)                                     | 1.77 (1.47, 2.20)                                     | 1.70 (1.33, 2.10)                     |
| GFR, mL/min/1.73m <sup>2</sup>                 | 40.6 (31.4, 53.7) | 41.4 (29.0, 52.0)                                     | 38.9 (31.4, 49.2)                                     | 40.6 (32.1, 55.5)                     |

Values are presented as median (25<sup>th</sup> percentile, 75<sup>th</sup> percentile) for continuous variables and number (%) for frequencies.
